# Supplementary material for: The mitochondrial-targeted peptide therapeutic elamipretide improves cardiac and skeletal muscle function during aging without detectable changes in tissue epigenetic or transcriptomic age
Source: PubMed Central journal article supplement — bioRxiv. 2024 Oct 31:2024.10.30.620676. Preprint. [Version 1] doi: 10.1101/2024.10.30.620676 (PMC11565897; doi:10.1101/2024.10.30.620676), 2024-10-31

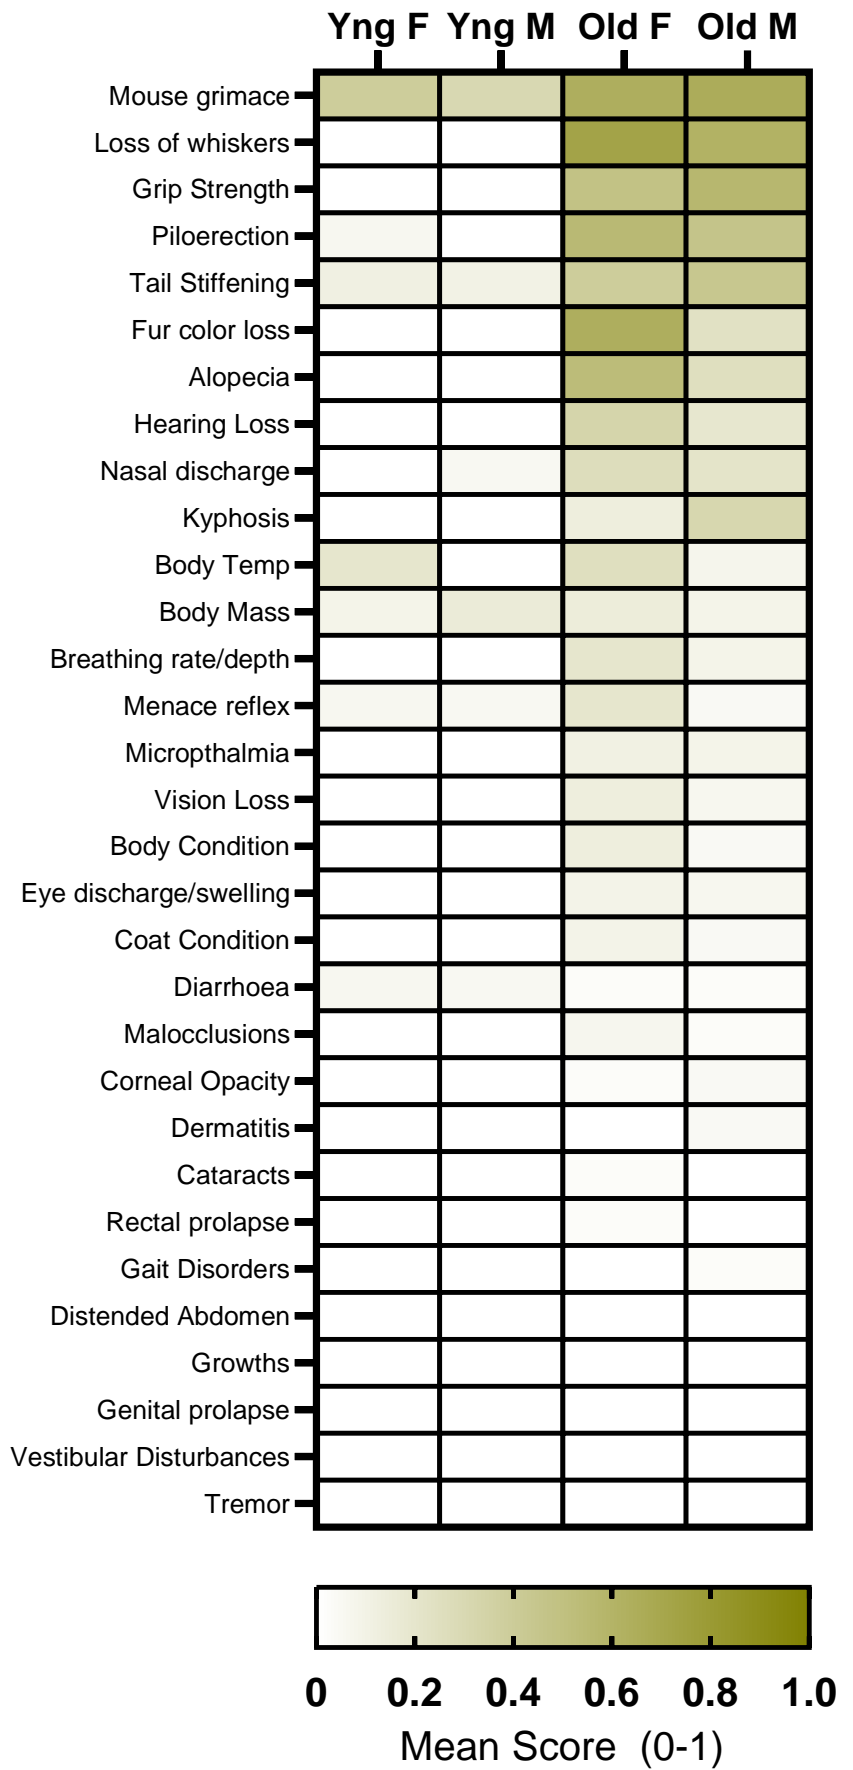

**Extended Data Figure 1**

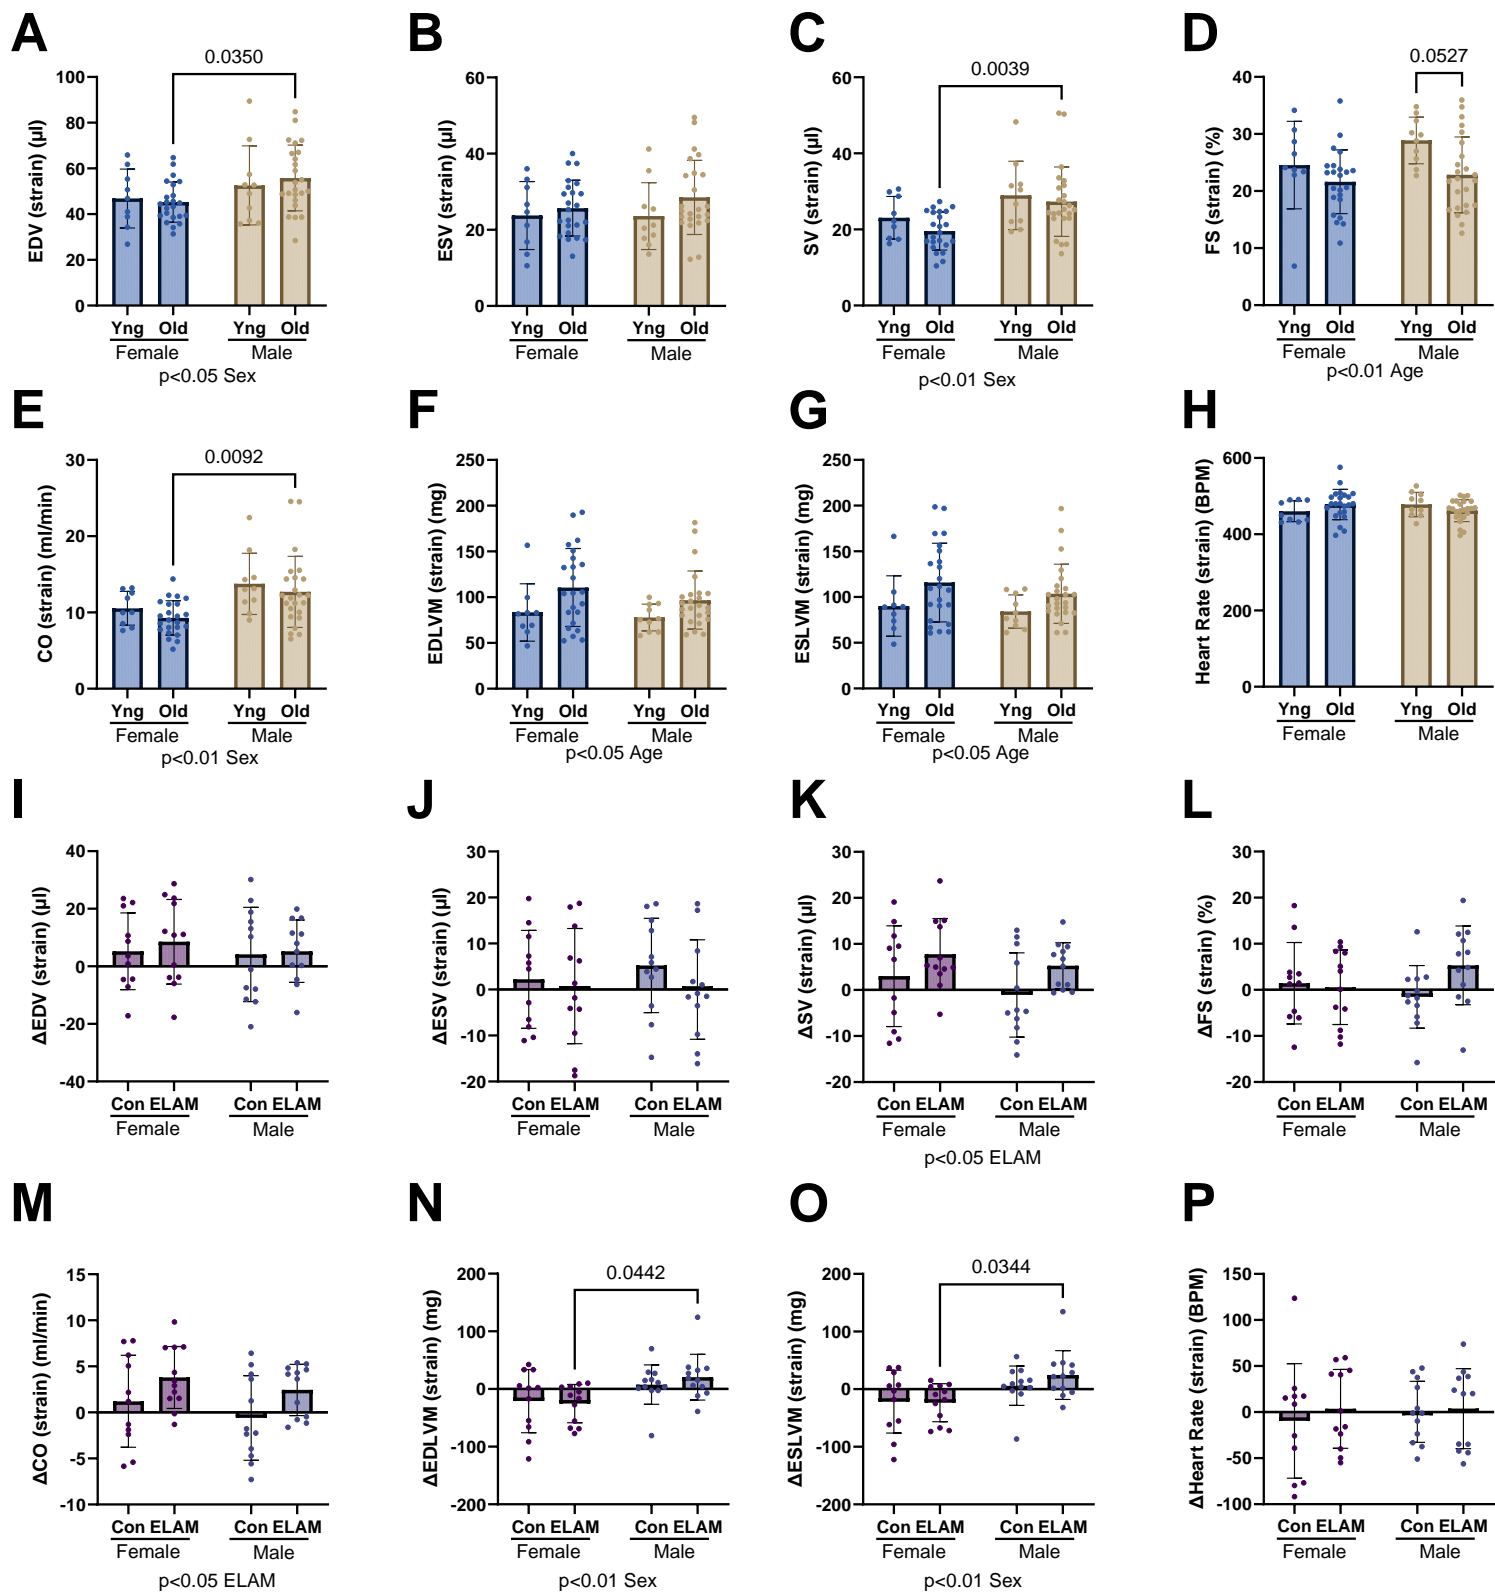

Extended Data Figure 2

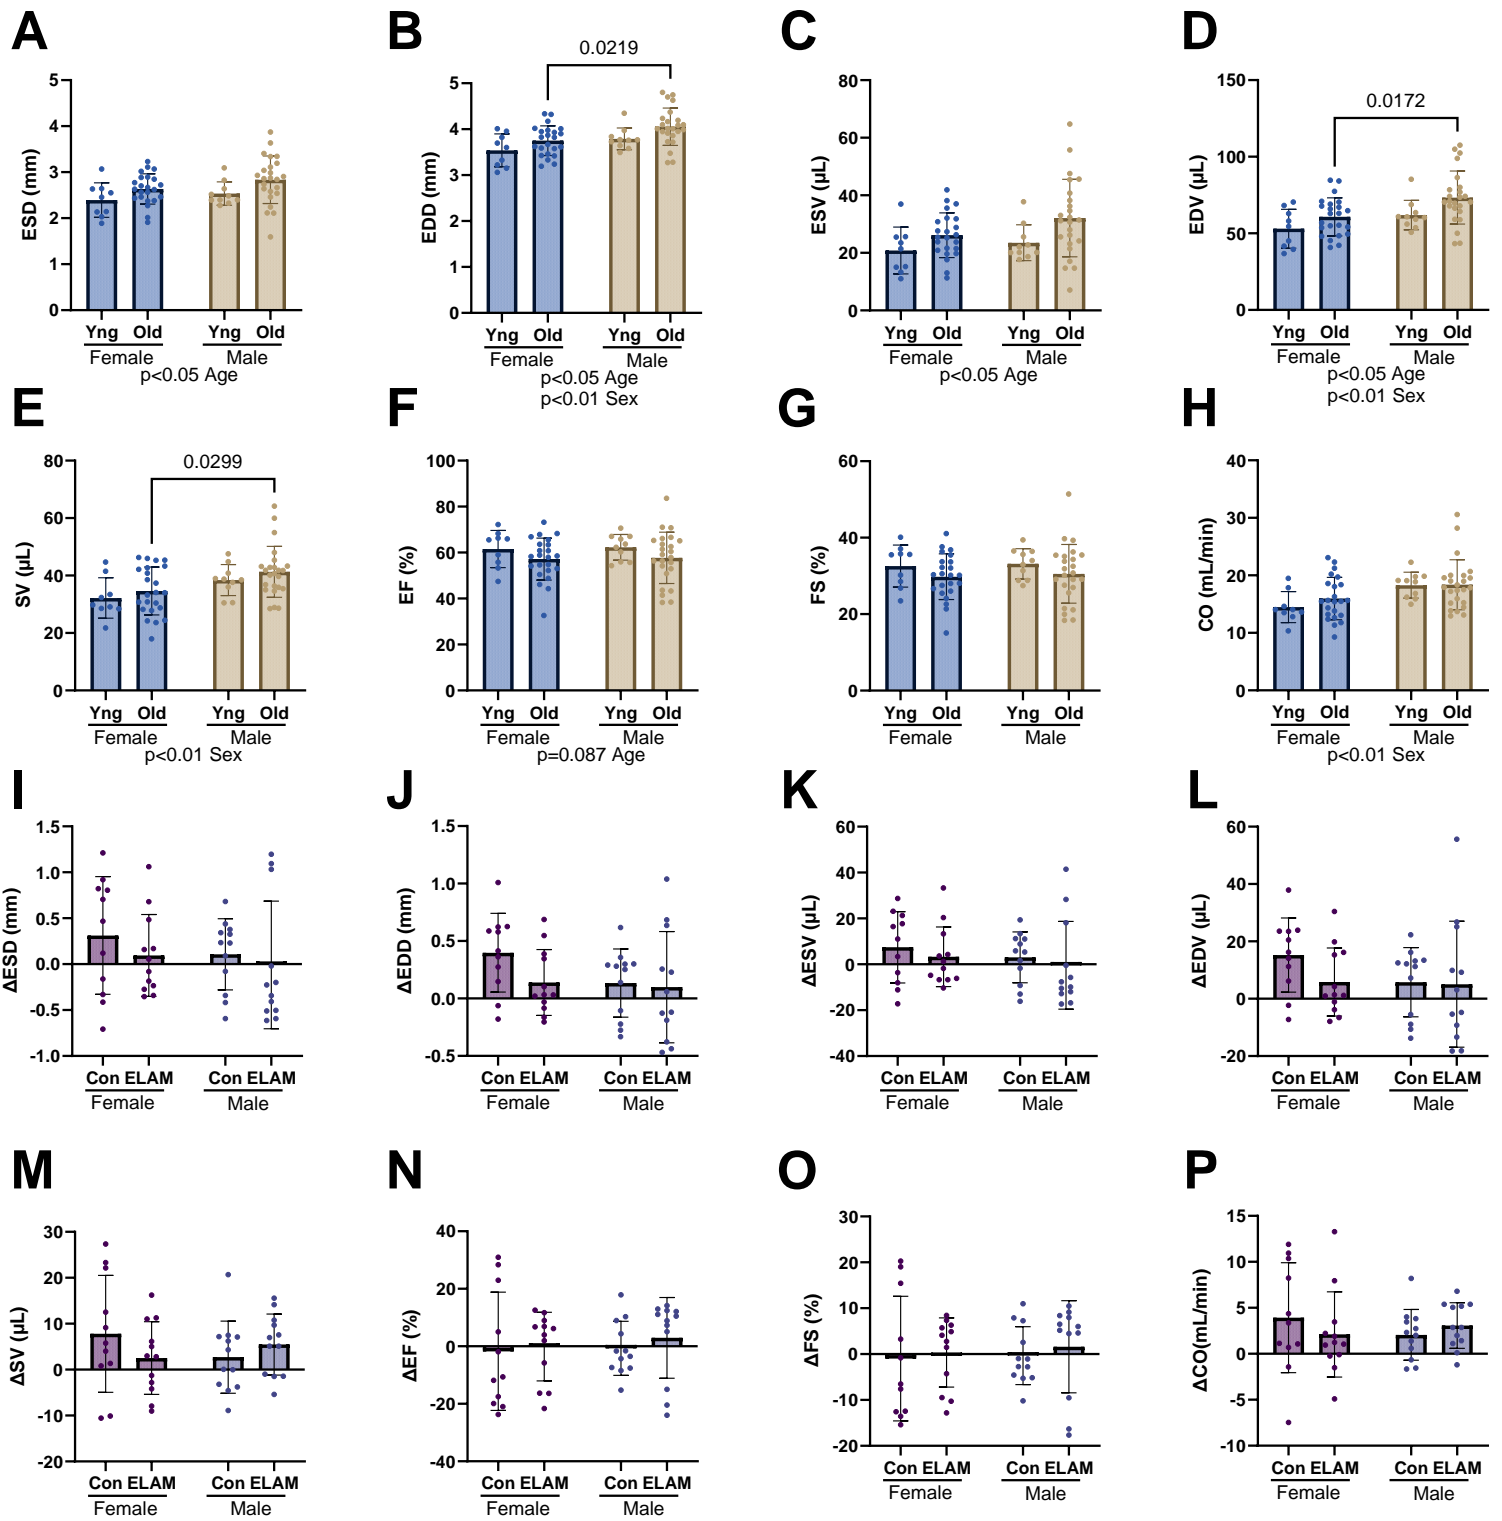

Extended Data Figure 3

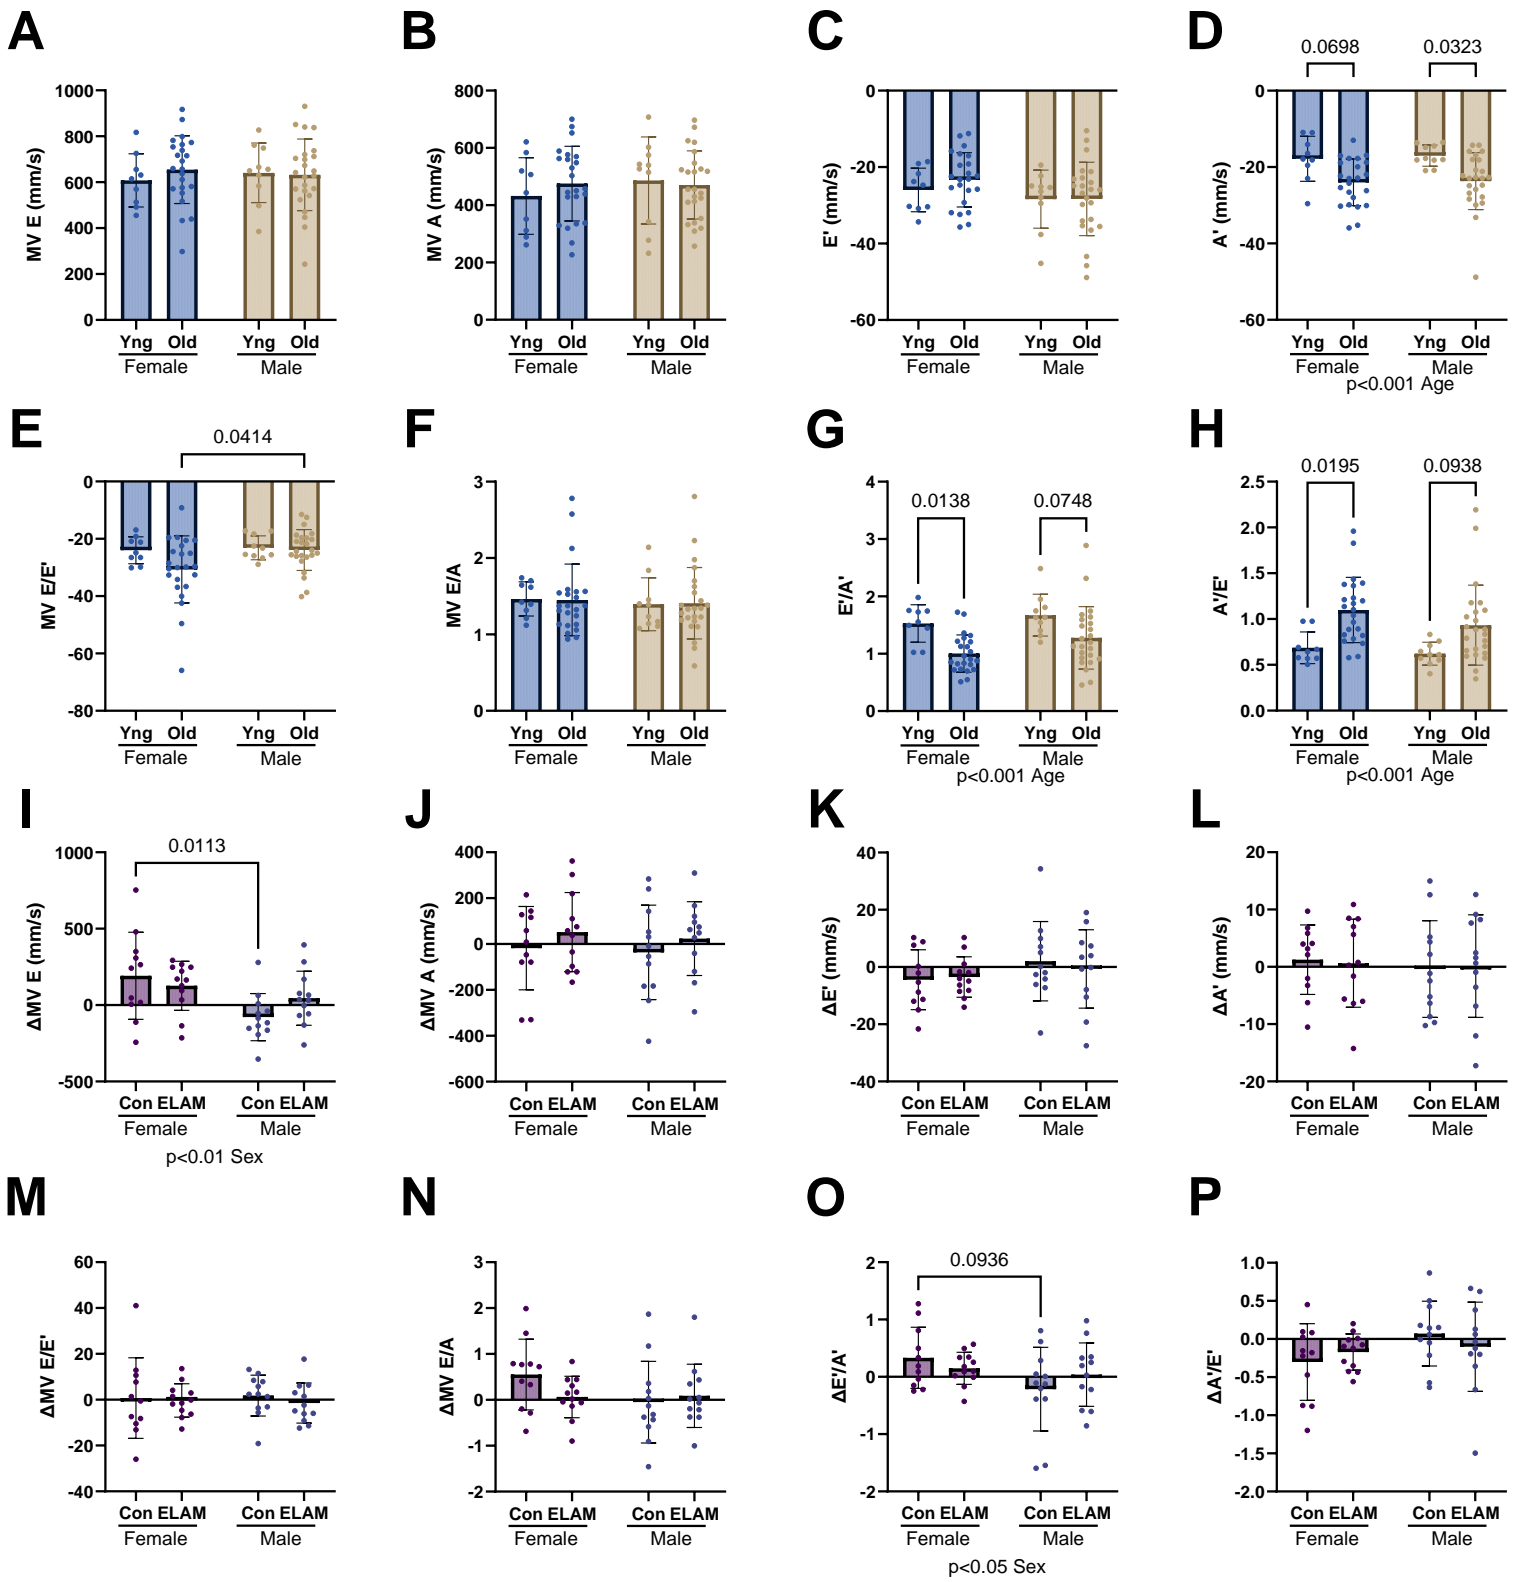

Extended Data Figure 4

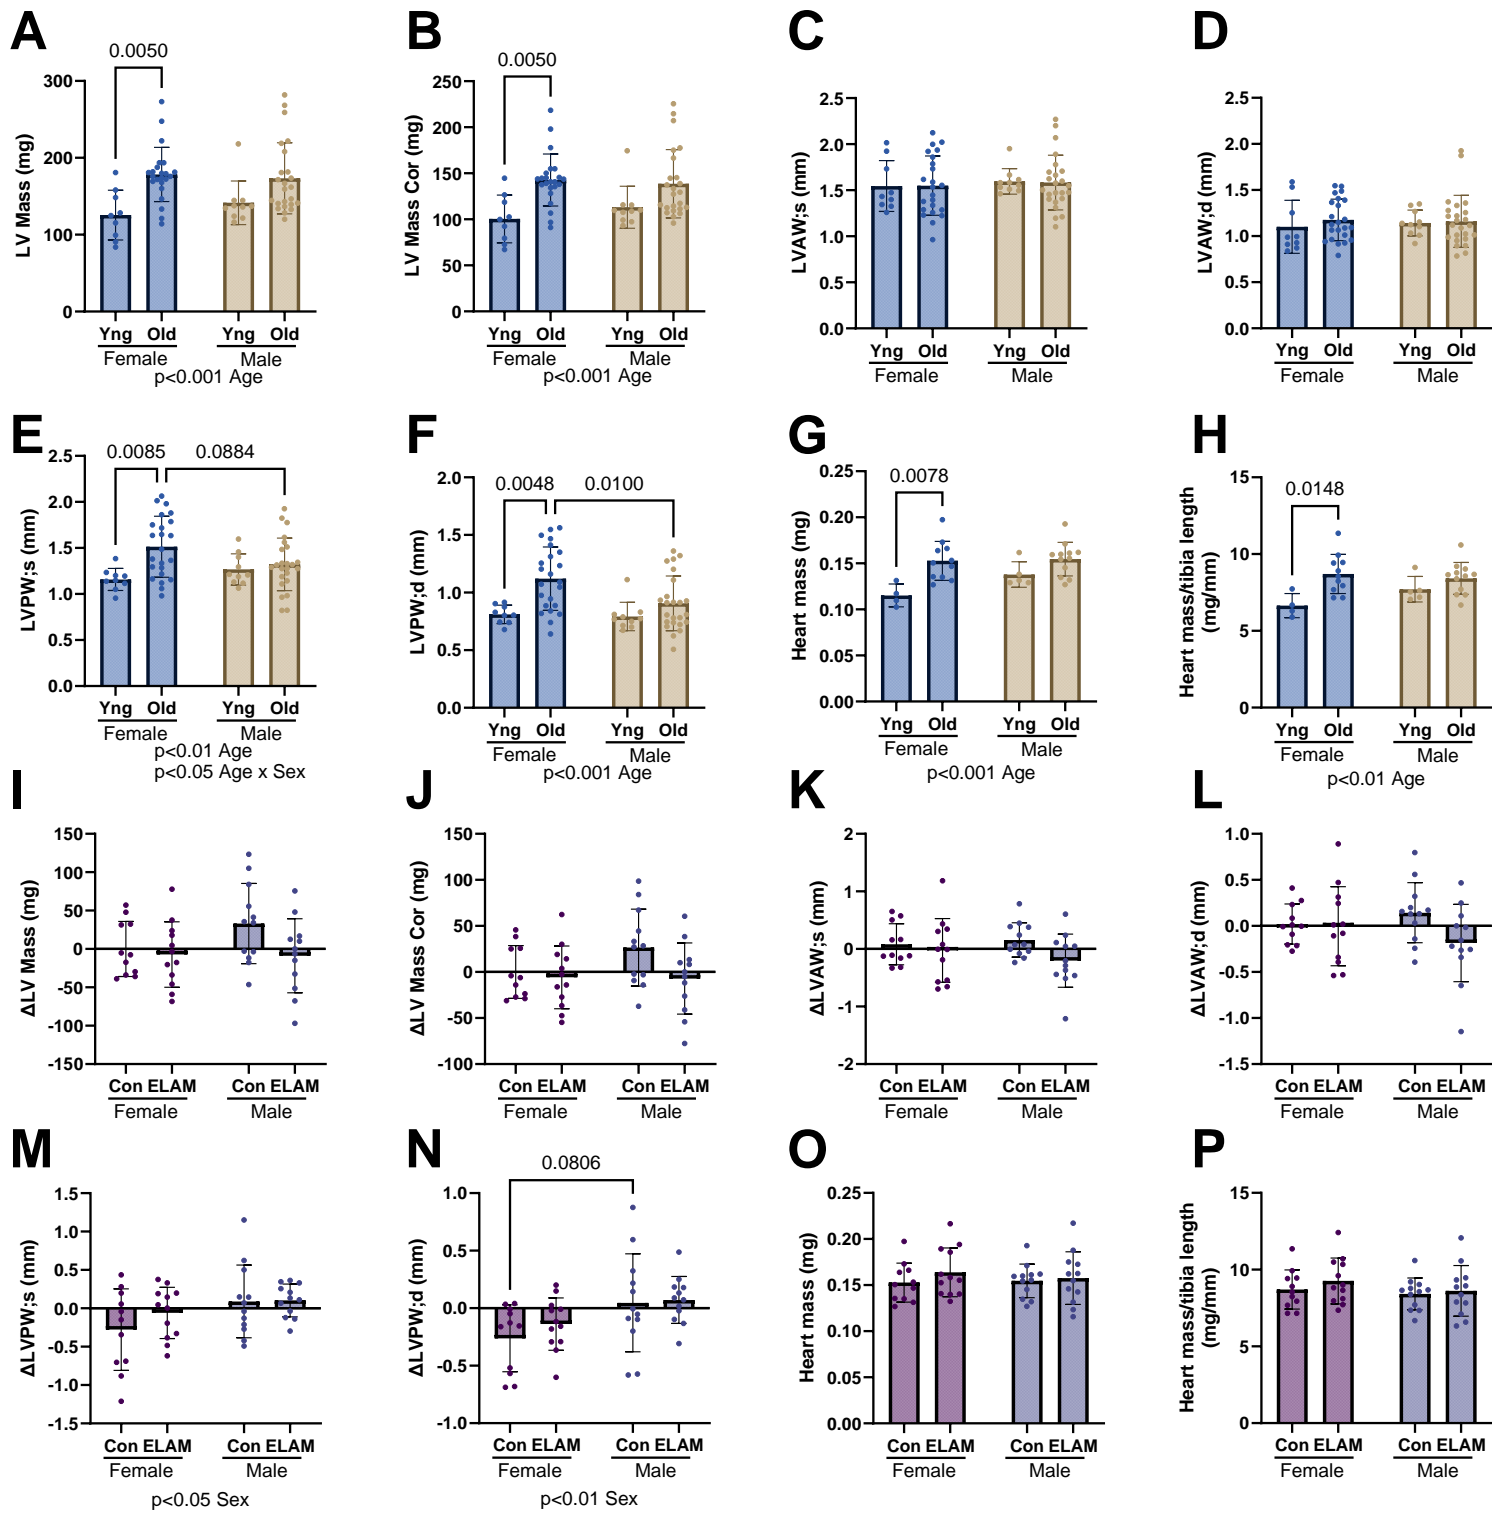

Extended Data Figure 5

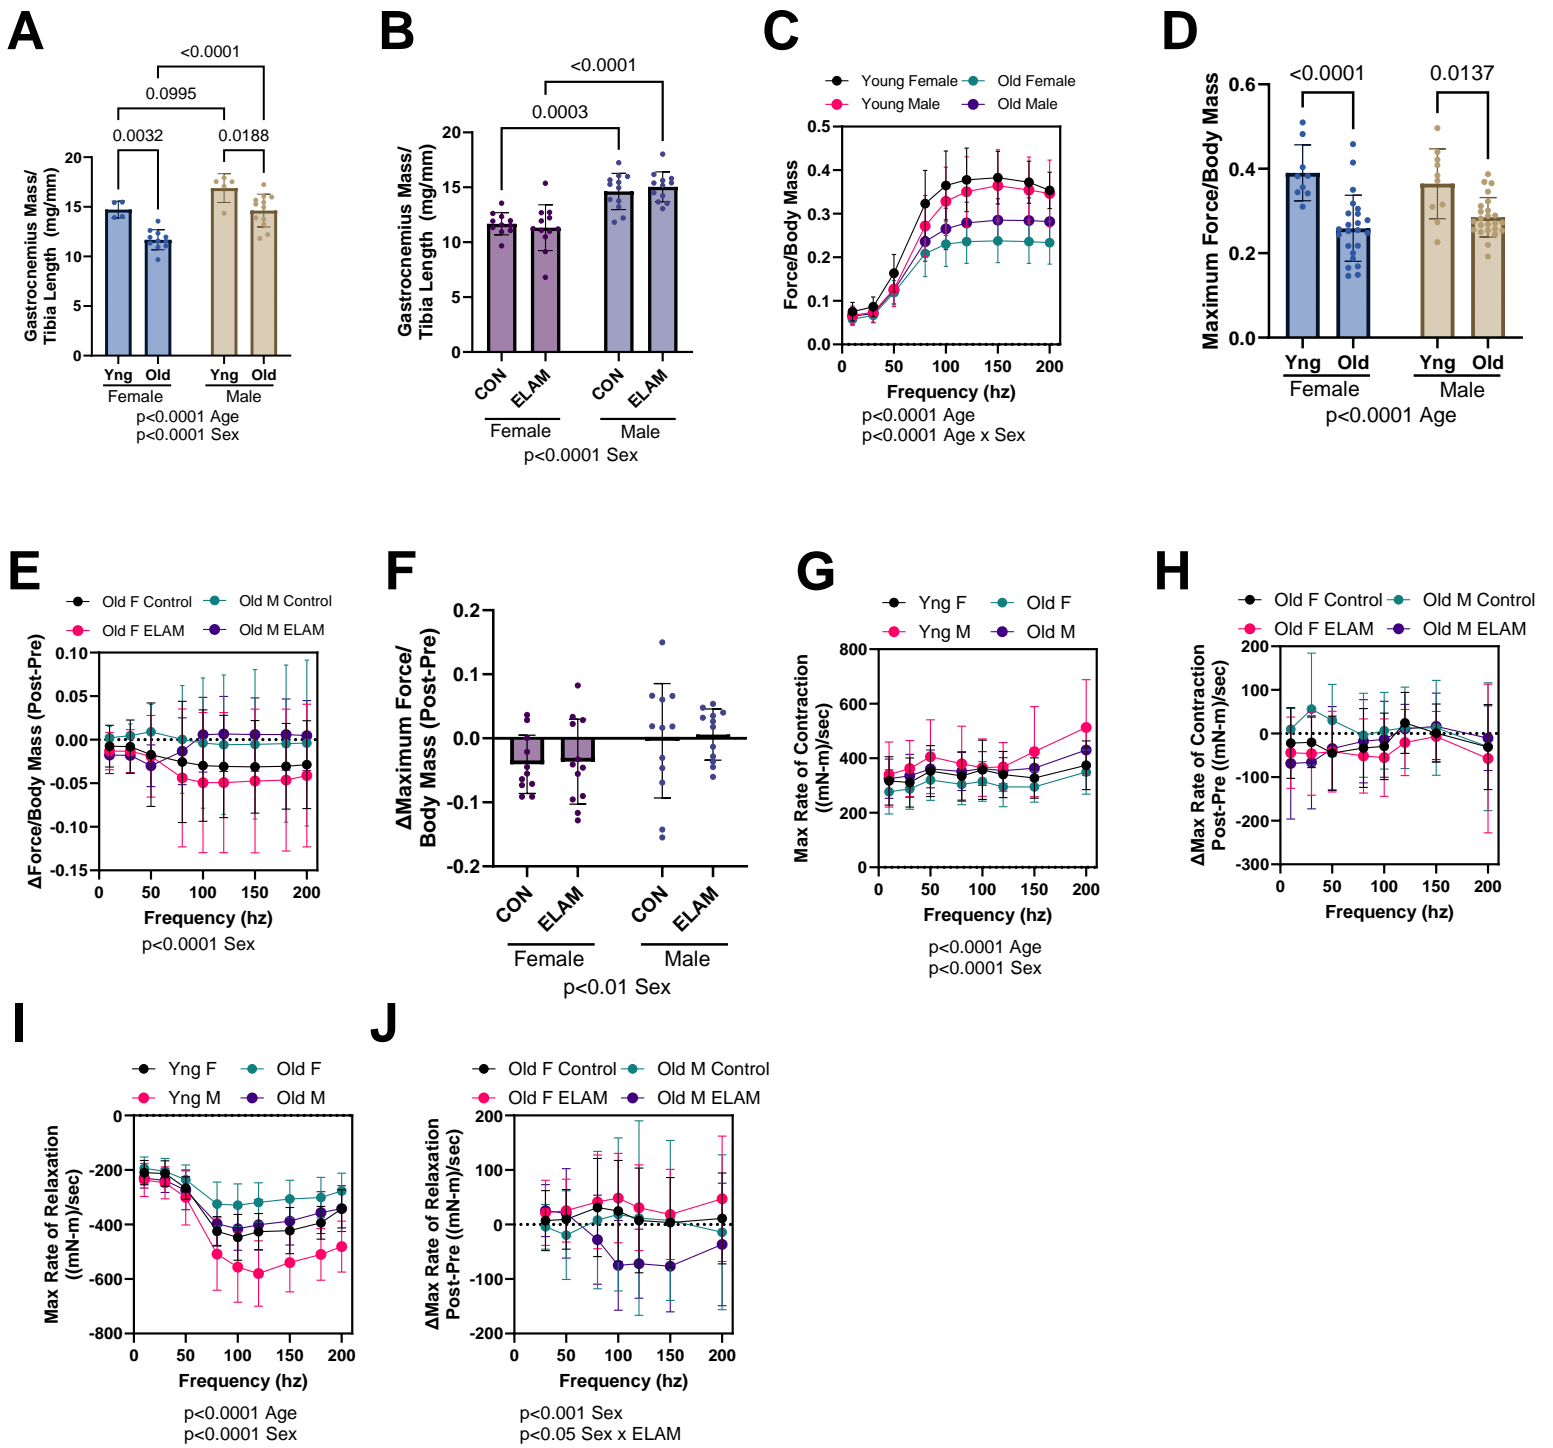

**A**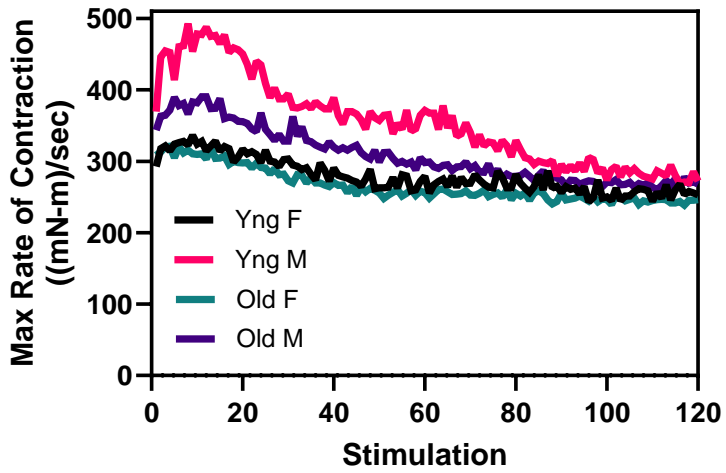

$p < 0.0001$  Age  
 $p < 0.0001$  Sex  
 $p < 0.0001$  Age x Sex

**B**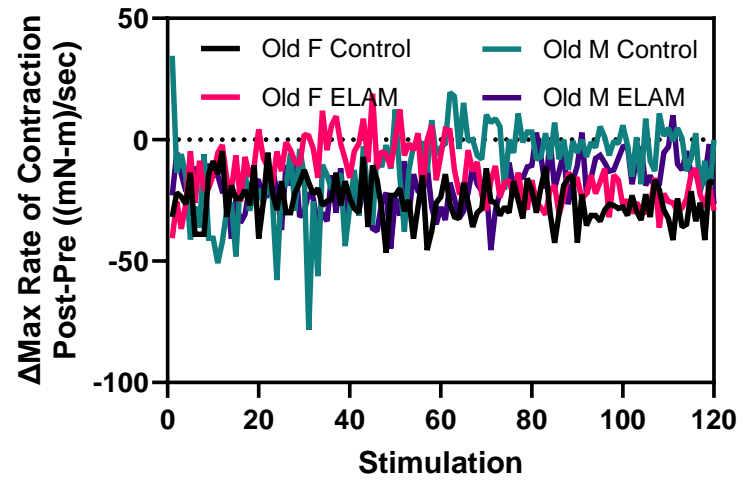

$p < 0.05$  Sex  
 $p < 0.001$  Sex x ELAM

**C**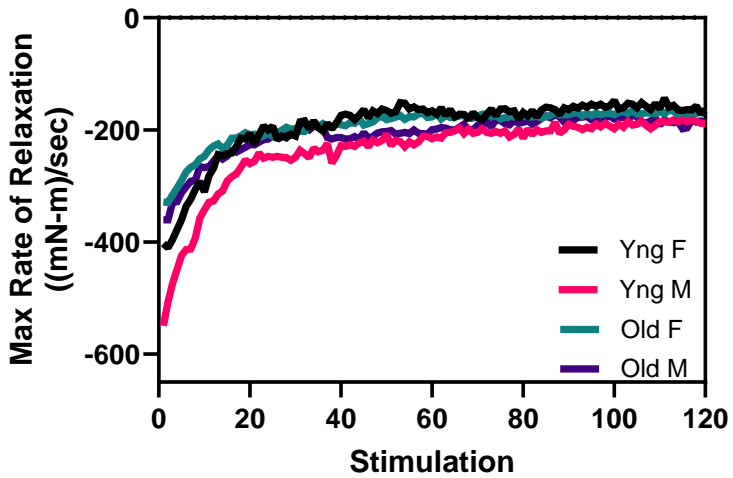

$p < 0.0001$  Age  
 $p < 0.0001$  Sex  
 $p < 0.0001$  Age x Sex

**D**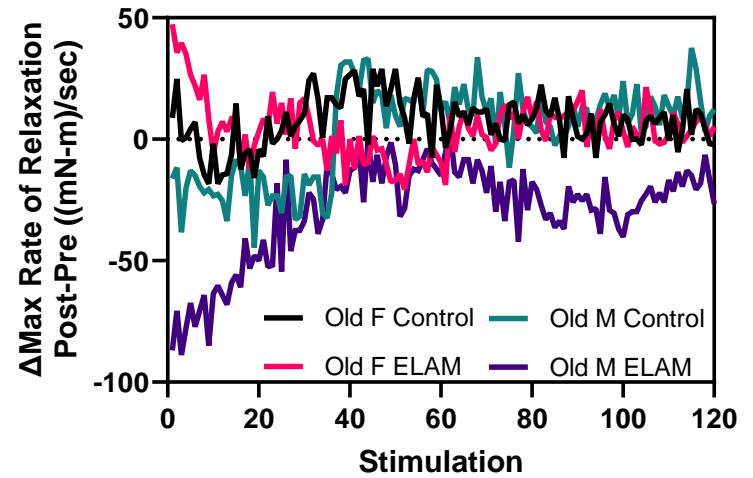

$p < 0.0001$  Sex  
 $p < 0.0001$  ELAM  
 $p < 0.0001$  Sex x ELAM

**A****Correlation - Genes**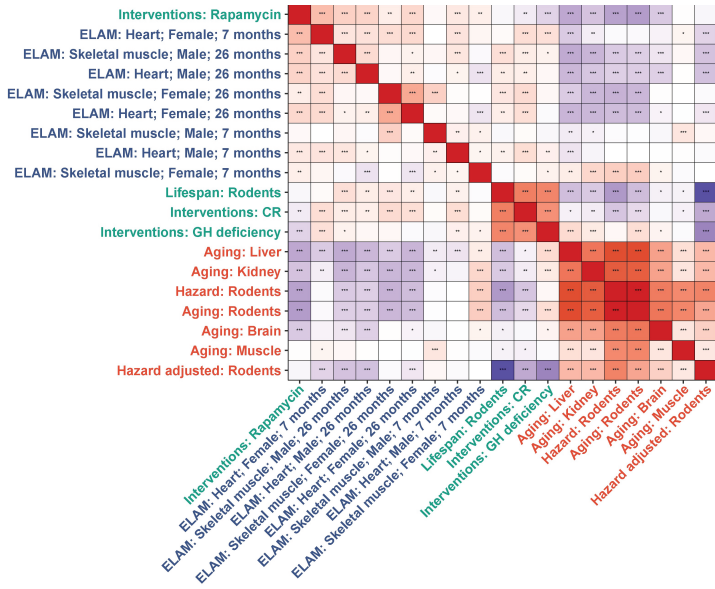**Correlation - Pathways**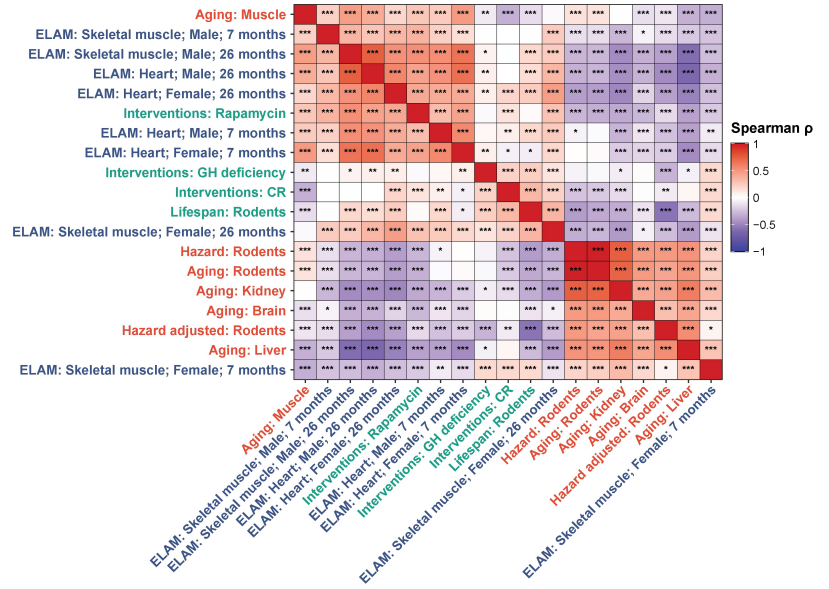**B****Chronological Clock**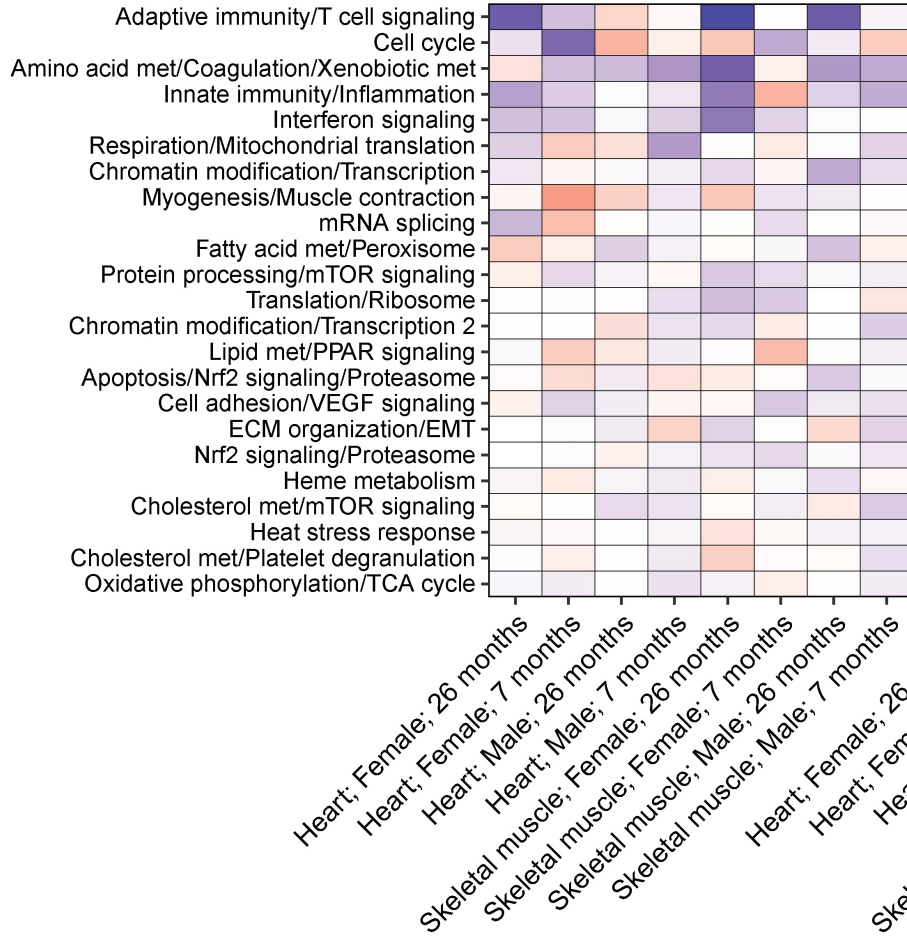**Mortality Clock**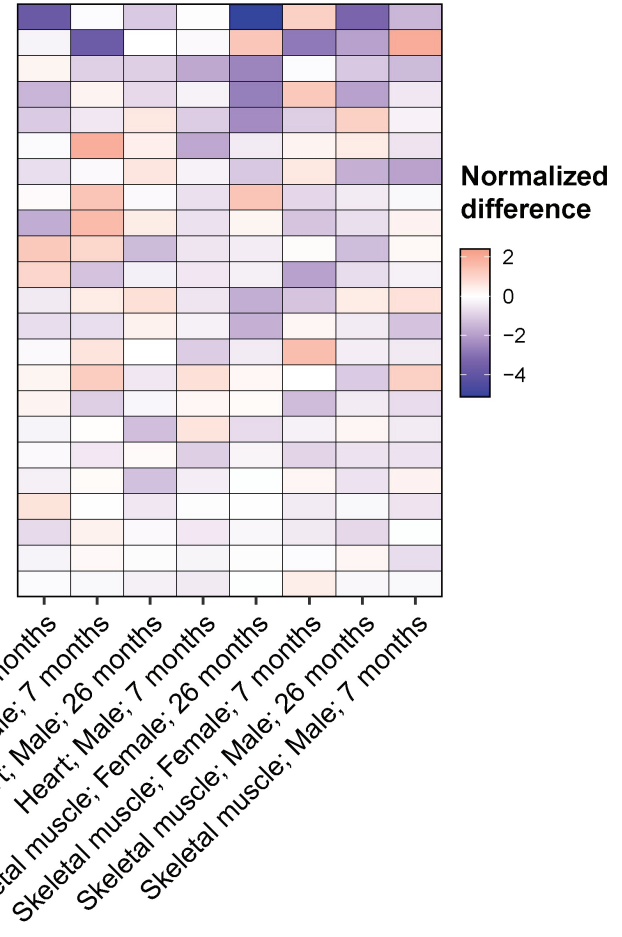**Normalized difference**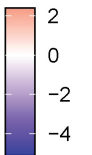



**A**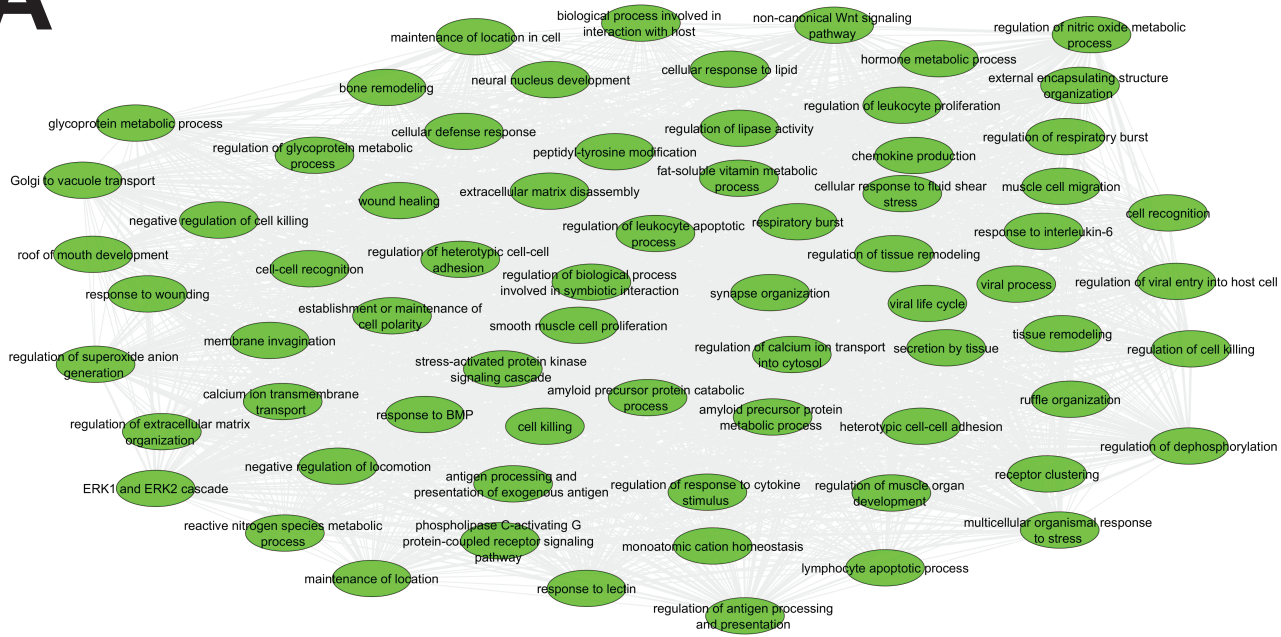**B**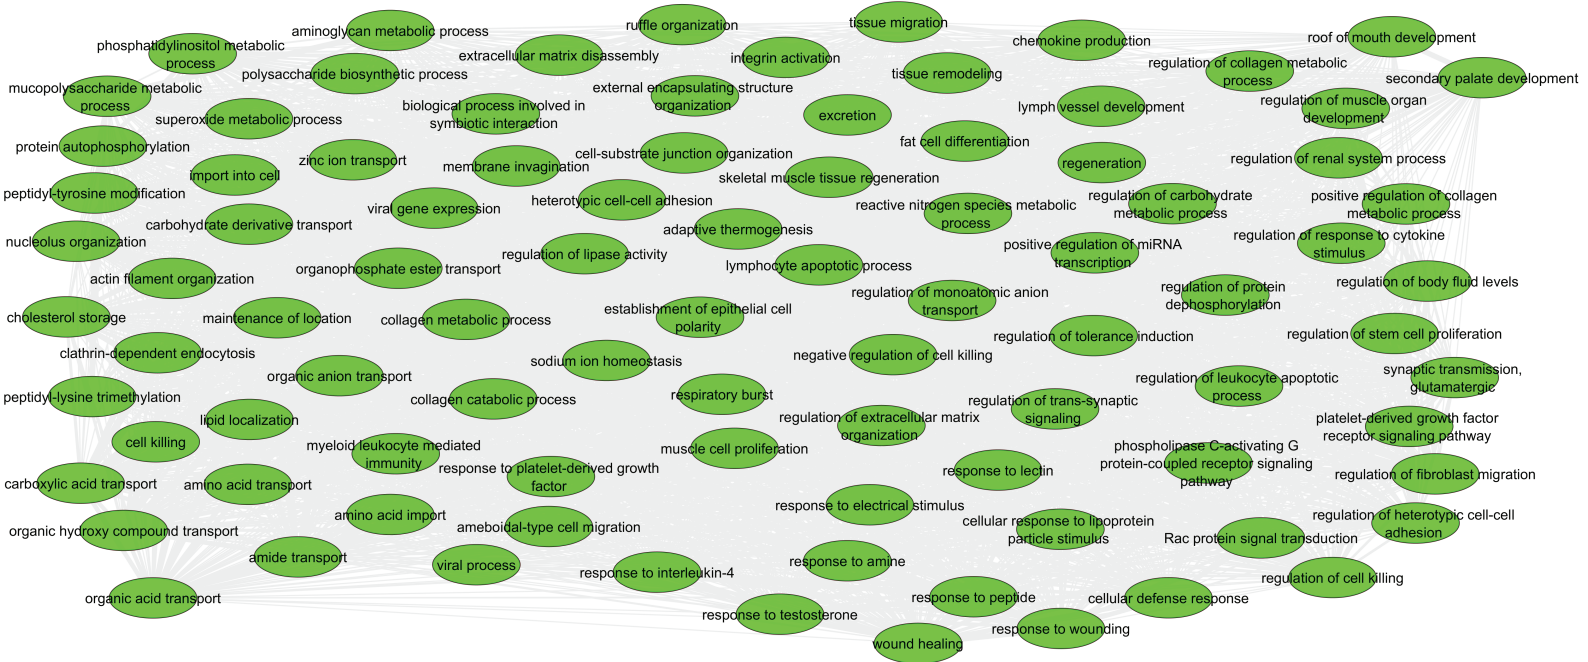

**A**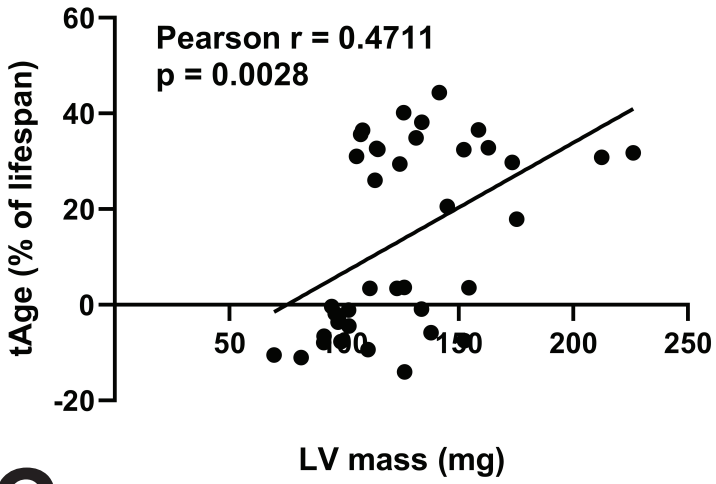**B**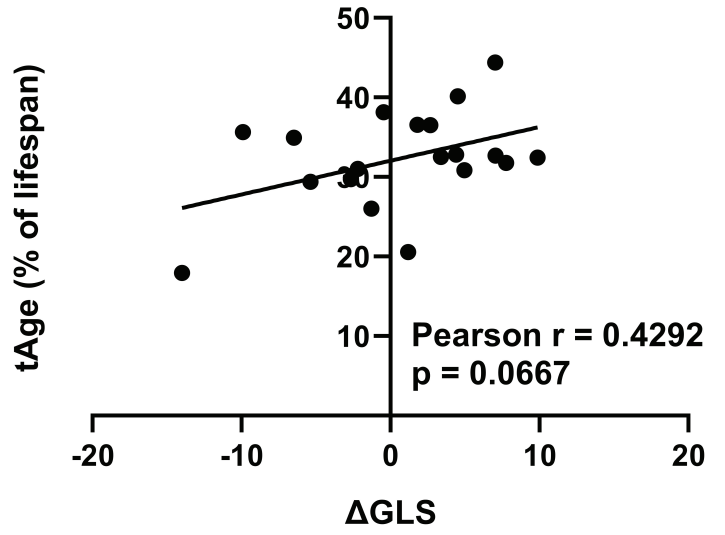**C**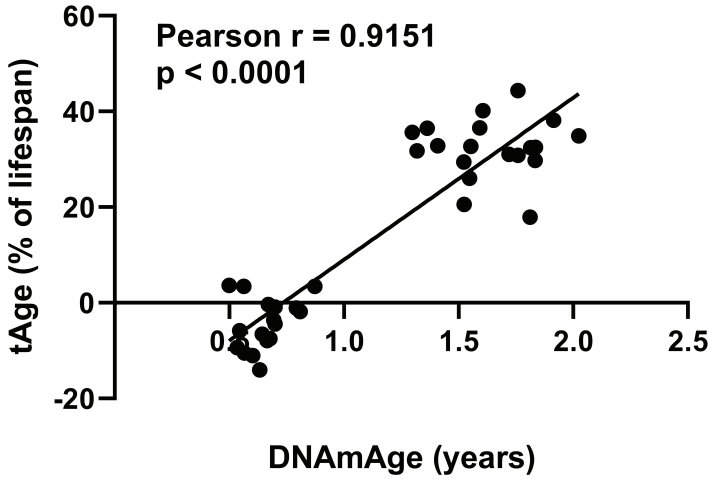

**A**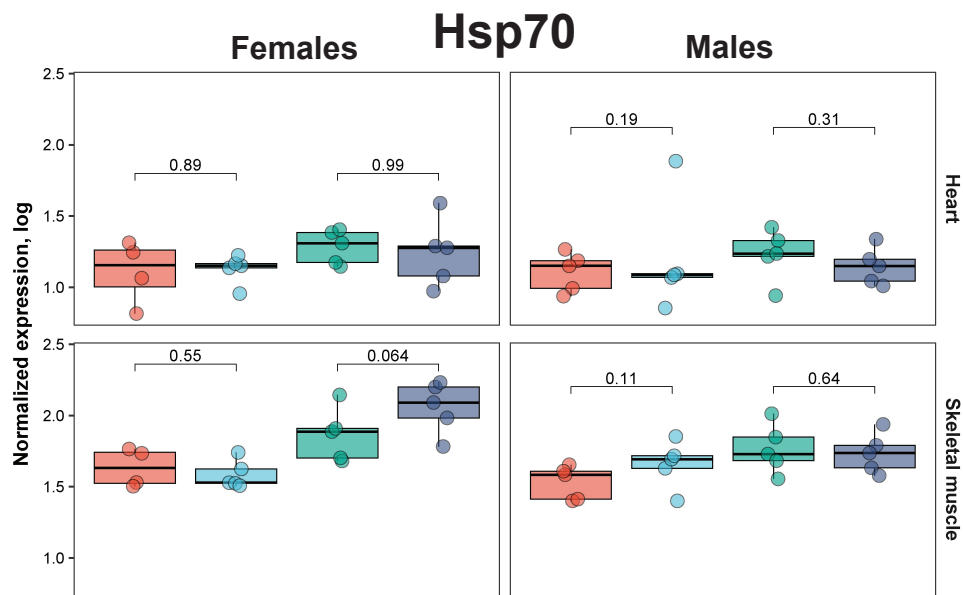**B**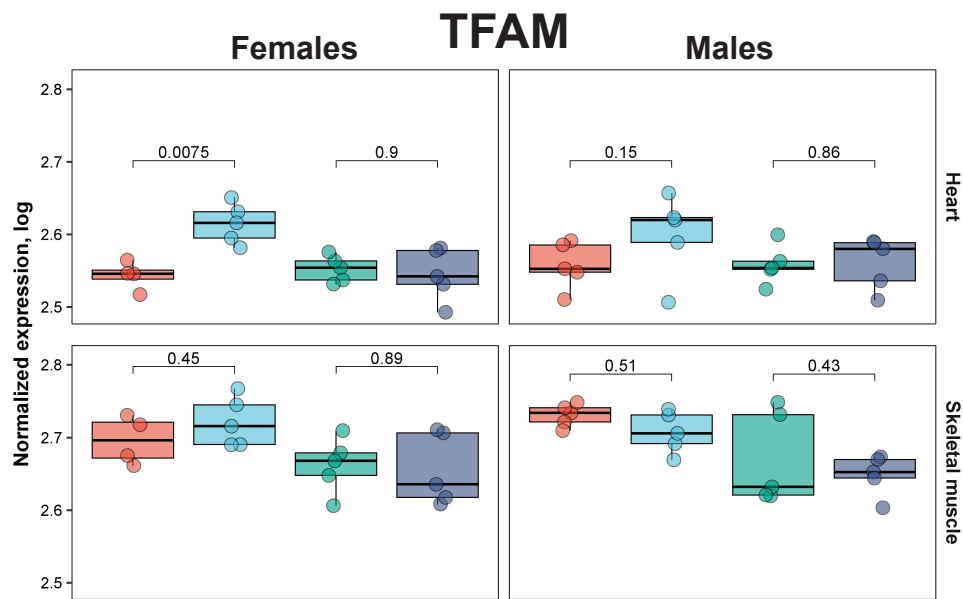**C**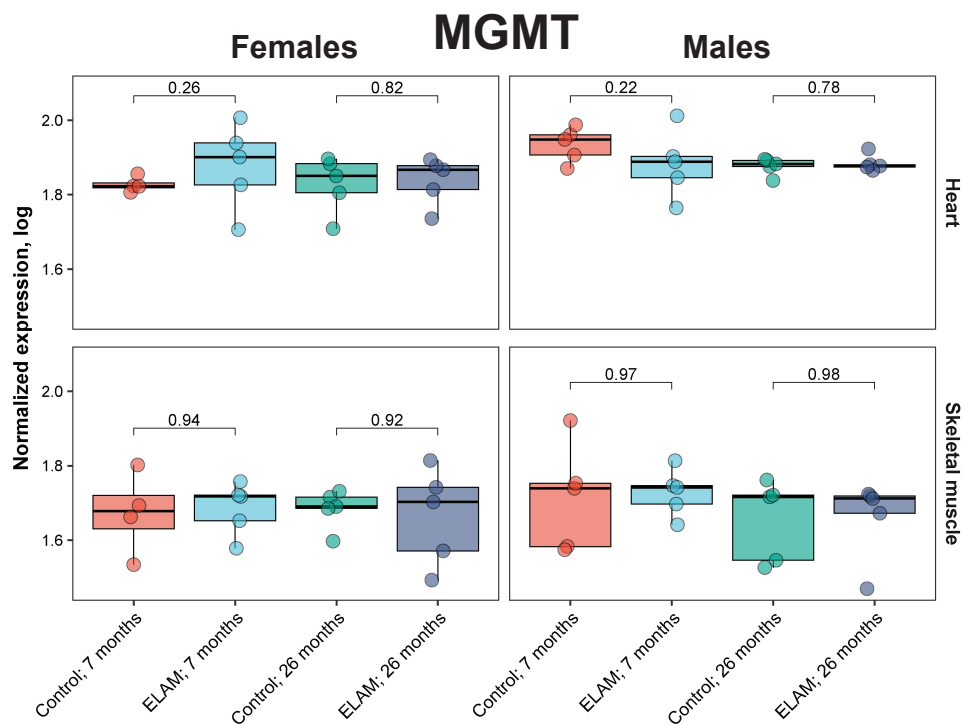

Supplement: media-1.pdf [file media-1.pdf]
